# Supplementary material for: Overexpression of a Triticum aestivum Calreticulin gene (TaCRT1) Improves Salinity Tolerance in Tobacco
Source: PubMed Central journal article supplement (PMC4607401; doi:10.1371/journal.pone.0140591), 2015-10-15
Supplement: pone.0140591.s002.pdf [file pone.0140591.s002.pdf]

**S1 Table. Primers used to isolate the *TaCRT* genes**

---

| Gene            | Sequence of primer pairs (5'-3')                  |
|-----------------|---------------------------------------------------|
| <i>TaCRT1</i>   | GAAGGCAGTAGAAATGGGTCCG/ GACCCACGGTGATGTTGTTCTTC   |
| <i>TaCRT2</i>   | GTTTTGGTTGCCAGGGTTCG/ CAGAGAAAATGTTCTTCTAATTGCTGG |
| <i>TaCRT3-1</i> | AGCCACCACCACTTCCTCGT/ GTGGAATTGT CTGTCCTGCTGTCAC  |

---
