# Supplementary material for: Overexpression of a Triticum aestivum Calreticulin gene (TaCRT1) Improves Salinity Tolerance in Tobacco
Source: PubMed Central journal article supplement (PMC4607401; doi:10.1371/journal.pone.0140591), 2015-10-15
Supplement: pone.0140591.s003.pdf [file pone.0140591.s003.pdf]

**S2 Table. Primers used for quantitative real-time PCR**

| Gene                               | Sequence of primer pairs (5'-3')                          |
|------------------------------------|-----------------------------------------------------------|
| <i>TaCRT1</i>                      | TCTGATGACGAGAAGCACGATGAGC/ GAGACAATAATAAATCCTGGCAGCGG     |
| <i>TaCRT2</i>                      | GGATGATGAGGAAGATGGTGAATGGAC/ CAGGCTGTCAAAGCGTAGATGTAAGG   |
| <i>TaCRT3-1</i>                    | TTACAAGGACAGATACAAAAGACGCAACAG/ TCCCTCACACGAGACAAGAAACTTC |
| <i>TaLEA</i>                       | CAGGAGGAAGAAGGGGATGAAG/ ACACGGGGTCCACACATACG              |
| <i><math>\alpha</math>-Tubulin</i> | ATCTCCAACCTCCACCAGTGTCG/ TCATCGCCCTCATCACCGTC             |
