# Supplementary material for: Overexpression of a Triticum aestivum Calreticulin gene (TaCRT1) Improves Salinity Tolerance in Tobacco
Source: PubMed Central journal article supplement (PMC4607401; doi:10.1371/journal.pone.0140591), 2015-10-15
Supplement: pone.0140591.s004.pdf [file pone.0140591.s004.pdf]

**S3 Table. Primers used for construction of *TaCRT* plant expression vector and transgenic plants detection**

| <i>TaCRT1</i> segments | Sequence of primer pairs (5'-3')                                          |
|------------------------|---------------------------------------------------------------------------|
| ORF                    | CTTA <u>AGATCT</u> CGGGGTAAAGGCTTCCAC/TATT <u>GGATCC</u> GAGCTCATCGTG     |
| SS region              | CTGA <u>ACTAGT</u> CGGGGTAAAGGCTTCCAC/ ACTAT <u>CTAGAG</u> ACGTCGGCGCTGAC |
| P-, C-domain and HDEL  | CTACT <u>CTAGA</u> AATGGATATTCTTCTCCC/ TATT <u>GGATCC</u> GAGCTCATCGTG    |
| C-domain and HDEL      | CGCAT <u>CTAGA</u> AATGGATGATCCTTACATCTA/ TATT <u>GGATCC</u> GAGCTCATCGTG |

The underlined sequences represented the inserted *Bgl*III, *Spe*I, *Xba*I and *Bam*HI sites, respectively.
