# Supplementary material for: Overexpression of a Triticum aestivum Calreticulin gene (TaCRT1) Improves Salinity Tolerance in Tobacco
Source: PubMed Central journal article supplement (PMC4607401; doi:10.1371/journal.pone.0140591), 2015-10-15
Supplement: pone.0140591.s005.pdf [file pone.0140591.s005.pdf]

#### S4 Table. Protein sequences used for construction of phylogenetic tree

> *T. aestivum* CRT1  
-----MAIR-RGSSCAVLAL---LALASVAAVSADVFFQEK---FEDGWESRWVKSEWKK  
DENM-AGEWNHTSGKWHGDAE-DKGIQTSEDYRFYAISAEYPEFSNKDKTLVLQFTVKHE  
QKLDCCGGYVLLGGDQKKFVGGDTPYSIMFGPDICGYSTKKVHTILTKDGKNHLIKKD  
VPCETDQLSHVYTLIIRPDATYSILIDNEEKQTGSIYEHWDILPPKEIKDPEAKKPEDWD  
DKEYIPDPEDVKPEGYDDIPKEVTDPAKKPEDWDDEEDGEWTAPTIPNPEYKGPWKQKK  
IKNPNYQGWKAPMIANPDFKDDPYIYAFDSLKYIGIELWQVKSGLTFDNILITDDAALA  
KTFAEETWAKHKEAEKAAFDAAEK-KKEEDASKASED-DDDLDEEADDED-KDDKAGS  
DAE-----SDDEK-HDEL

> *T. aestivum* CRT2  
-----MAVLARSAAVAALA-----LLASAVAGEVFFQEK---FDDGWEDRWVKSEWKK  
EDNT-AGEWNHTSGKWNADAD-DKGIQTSEDYRFYAISAQYPEFSNKDKTLVLQFSVKHE  
QDLDCGGYVLLPADVDQKKFVGGDTPYSIMFGPDICGYATKKVHAILTKNGKNHLIKKE  
VPCETDQLTHVYTLILRPDATYSILIDNVEKQSGSVYDDWDILPAKKRDPNAKKPEDWE  
DEEFLPDPEKPEGYDDIPKEITEPDATKPEDWDDEEDGEWTAPTIPNPEYKGPWIQKK  
IKNPNFKGKWKAPLIDNPEFKDDPYIYAFDSLKHIGIELWQVKSGLTFDNILITDDPEYA  
KKFAEETWKGKHKDAEKAADFDEAEK-KRLEESANAKTEDNDDAADEDEGKAAGASDEENK  
DASGDEKVEEISKDASSSSDK-KDEL

> *T. aestivum* CRT3-1  
-MGSSRRRGRD--H-LKLLHRLALSSLLLLASGEVIFEER---FEDGWETRWWKSDWKK  
SEGK-AGMFKHTAGKYSGDPD-DKGIQTTIDARHFAISAKIPEFSNKGRTLTVVQYSIKFE  
QEIECGGGYIKLTSYVNVQKKYSGDTPYSIMFGPDICGTQTKLHLILSYQGQNYPIKDK  
LQCETDRLTHVYTFILRPDASYSLVDNRERESGSMYTDWDILPPRKIKDVGAKKPKDWD  
DREYIEDPDAVKPEGYDSIPREIPDPKDKKPDWDDDDGGIWKPRRIIPNPAYKGPWKRRK  
IKNPNYKWKWIPWIDNPEFEDDPDLYVLKPLKYIGIEVWQVKSGLTFDNILICDDPEYA  
KQVADETWGANKEAEKEAFKEAEKERKAREDKAEQQAREEGERRRRERGRHRGRDHYKD  
RYKRRNRDHWDD-----YHDEL

> *T. aestivum* CRT3  
MMGSSRRRGRDQLQ-FQLLHRLALSSLLLLASGEVIFEER---FEDGWETRWWKSDWKK  
SEGK-AGMFKHTAGKYSGDPD-DKGIQTTIDARHFAISAKIPEFSNKGRTLTVVQYSIKFE  
QKIECGGGYVLLMSGYVNVQKKYSGDTPYSIMFGPDICGTQTKLHLILSYQGQNYPIKDK  
LQCETDRLTHVYTFILRPDASYSLVDNRERESGSMYTDWDILPPRKIKDAGAKKPRDWD  
DPEYIEDPDAVKPEGYDSIPKEIPDPKDKKPDWDDDDGGIWKPRRIIPNPAYKGPWKRRK  
IKNPNYKWKWIPWIDNPEFEDDPDLYVLKPLKYIGIEVWQVKSGLTFDNILICDDPEYA  
KQVADETWGANKEAEKEAFEEAEKERKAREDKAEQQAREEGERRRRERGRHRGRDHYKD  
RYKRRNRDHWDD-----YHDEL

> *N. plumbaginifolia* Crt  
--MATQRRANPSSLHLITVFSL-----LVAVVSAEVFFFEES---FNDGWESRWVKSEWKK  
DENM-AGEWNHTSGKWNADAN-DKGIQTSEDYRFYAISAEFPEFSNKGKLVFQFSVKHE  
QKLDCCGGYMKLLSGDQKKFVGGDTPYSIMFGPDICGYSTKKVHAILTYNDTNHLIKKE  
VPCETDQLTHVYTFILRPDATYSILIDNVEKQSGSLYSDWDLPPKTIKDPKAKKPEDWD  
EKEFIDDPEDKPEGYDDIPEEITDPDAKKPEDWDDEEDGEWTAPTIPNPEYKGPWKPKK  
IKNPNYKWKWAPLIDNPDFKDDPDLYVFPKLYVGVELWQVKSGLTFDNIVICDDPEYA  
KAIAEETWKGKQDAEKAFAEEAEK-KREESKAAPADSDAE-EDDDADDDSDAD--DK  
SESKDDEAH-----DEL

> *A. thaliana* Crt3  
-MGLPQNKLSFFCF-----FFLVSVLTLAPLAFSEIFLEEH---FEGGWKSRWVLSWKR  
NEGK-AGTFKHTAGKWPDPD-NKGIQTYNDKHYAISAKIPEFSNKNRTLTVVQYSVKIE  
QDIECGGAYIKLLSGYVNVQKQFVGGDTPYSIMFGPDICGTQTKLHVIVSYQGQNYPIKDK  
LQCETDKLNHFYTFILRPDASYSLVDNKEREFSGSMYTDWDILPPRKIKVKNKAKKPEDWD  
DREYIDDPNDVKPEGFDSIPREIPDRKAKEPEDWDEEENGLWEPPKIPNFAYKGPWKAKR  
IKNPNYKWKWNPWIDNPEFEDDPDLYVLSIKYAGIEVWQVKSGLTFDNILICDDPAYA  
RSIVDDYFAQHRESEKELFAEAEKERKAREDEEARIAREEGERRRERDHYK--GDRRRR  
YKRPNPRDYMD-----YHDEL

> *M. truncatula* Crt3  
---MAENAS-----TELKMFVLFCLLLIQVSLSEVIFEER---FEDGWRSRWVRSWKS

SE GK-AGSFKHTAGKWAGDPD-DKGIQTSNDAKHFAISAKIPEFSNKNRTL V FQYSIKFE  
QEIECGGGMKLLSGFVNQKKFGGDPYPSV MFGPDL CGTDTK LHVIVSYQGQNY PVK KD  
LQCETDKLTHFYTFILRPDATYSVLVDNRERDSGLYTDWDILPPRKIKDLKAKKPADWE  
DREYIEDPNAVKPEGYDSIPAEIPDPKAKEPDSWDEDEDGIWKRPKIPNPAYKGPWKRKK  
IKNPNYK GKWKTPWIDNPEFEDDPDLYVLKPIKYVGI EVWQVKGGSVFDNILICDDPEYA  
KQVVDEVFAN-REIEKEAFEEAEKVRKAQEEEEEAQRAREDGERRRKERGYDRH-RDRHRD  
RYRKHRRDYMDD-----YHDEL

> B. napus Crt  
-----MAKLT--LASSPWFLS-----VSWRSLPPLLSSRNALMMDGRTDGLNQSGRKR  
TSLLGSGATLLEIGLVMLTIK-VSRPARTDSTPSQLSSLN--SATRTKTLVCFQSVKHE  
QKLDCCGGGMKLLSGDQKFKGGDPYPSIMFGPDI CGYSTKKVHAILTYNDANHLIKKD  
VPCETDQLTHVYTFILRPDATYTILVDNVEKQTGSLYSDWDL LPPKKIKDPSAKKPEDWD  
EQEYIPDPEDKKPDGYDDIPKEIPD TDAKKPEDWDEEEDGEWTAPTIPNPEYMG EWKPKQ  
IKNPNYK GKWEAPEIDNPDFKDDPELYVFPK LKYVGI ELWQVKSGSLFDNVLICDDPDYA  
KKLAEETWGK LKDAEKA AFDEIEK-KKEEEESKDAPAE T DGEDEAE EDEG--EESDTE SK  
T-EAKSEVSEET---AEKDATAHDEL

> A. thaliana Crt2  
-----MAKMIPSLVSLILIGL-----VAIASAAVIFEER---FDDGWENRWV KSEWKK  
DDNT-AGEWKHTAGNWSGDAN-DKGIQTS EDRFYAISA EFP EFSNKDKTLV FQF SVKHE  
QKLDCCGGGMKLLSGDQKFKGGDPYPSIMFGPDI CGYSTKKVHAILTYNGANHLIKKD  
VPCETDQLTHVYTFILRPDATYSILIDNVEKQTGSLYSDWDL LPPKKIKDPSAKKPEDWD  
EQEYISDPEDKKPDGYDDIPKEIPD TDSKKPEDWDEEEDGEWTAPTIPNPEYMG EWKPKQ  
IKNPNYK GKWEAPLIDNPDFKDDPELYVFPK LKYVGL ELWQVKSGSLFDNVLICDDPDYA  
KKLADETWGK LKDAEKA AFDEAEK-KNEEEESKDAPAE SDAE DEPEDEG-GDDSDSESK  
AEETKSDSEET---SEKDATAHDEL

> B. vulgaris Crt  
---MENRGRNPSFLSLLLLLS-----LFAIASAKVFFEER---FEDGW EKRWV KSEWKK  
DESM-AGEWNYTSGKWN GDAN-DKGIQTS EDRFYAISA EFP EFSNKDNTLV FQF SVKHE  
QKLDCCGGGMKLLSGEVDQKFKGGDPYPSIMFGPDI CGYSTKKVHAI FNYNDTNHLIKKD  
VPCETDQLTHVYTFILRPDATYSILIDNQE KQTGSLYTDWDL LPAKKIKDPEAKKPEDWD  
DKEFIPDPEDKKPEGYDDIPAEITDPEAKKPEDWDEEEDGEWTAPTIPNPEYKGPWKAKK  
IKNPNYK GKWKAPMIDNPEFKDDPELYVYPK LRYVGL ELWQVKSGTLFDNVLV CDDPEYA  
KQLAEETWGK QKDAEKA AFEELEK-KREEEETKDDPVESDAE-DEDEAEADDSKDDADK  
SDDKDDQH-----DEL

> B. rapa Crt3  
-MRLTQNK LKPFH-----LFLFSLLTLTPLAFSEIFFEEH---FEGGWKSRWV LSWDKR  
NEGK-AGTFKHTAGKWPGDPD-NKGIQTYNDAKHYAISA KIQEFSNKNRTL VVQYSVKIE  
QDIECGGAYIKLLSGYVNQKQFGGDPYPSLMFGPDI CGTQT K LHVILSYQGQNYPIK KD  
LQCETDKL NHFYTFILRPDASYSVLVDNKEREF GSMYTDWDILPPRKIKVKNAKKPV DWD  
DREYIDDPDVKPEGYDSIPREIRDQKAE EPD WDEEENGPWEAPKIPNPAYKGPWKAKK  
IKNPNYK GKWKNPWIDNPEFEDDPDLYVLKPIKYIGIEVWQVKAGSIFDNILITDDPQYA  
RAMVDDYFEQHRESEKELFAEAEKEREKAREEE-----

> G. max Crt1  
---MAFRVRSPLRSLFLLS-----LLSIASANVFFEER---FDDGWENRWV KSDWKK  
DENV-AGEWNHTSGQWNGDAN-DKGIQTS EDRFYAISA EY P EFSNKGKTLV FQF SVKHE  
QKLDCCGGGMKLLSGDQKFKGGDPYPSIMFGPDI CGYSTKKVHAILTYNNTNHLIKKD  
VPCETDQLTHVYTFILRPDATYSILIDNVEKQTGSLYSDWDL LPPKTIKDPEAKKPEDWD  
DKEYIPDPEDKKPEGYDDIPKELPDPEAKKPEDWDEEEDGEWTPPTIANPEYKGPWKA EK  
IKNPNYK GKWKAPLIDNPDFKDDPDLYVFPNLKYVGI ELWQVKSGTLFDNVLITDDPEYA  
KQLVEETWGK HKDAEKA AFEEAEK-KREEEESKDDPVDSDADEEEDADEAGNDSDAESK  
TEAGEDTKE-----EGVHDEL

> N. tabacum Crt  
-----EVFFFEES---FNDGWESRWV KSEWKK  
DENM-AGEWNHTSGKWN GDAN-DKGIQTS EDRFFAISA EFP EFSNKGKNLV FQF SVKHE  
QKLDCCGGGMKLLSGDQKFKGGDPYPGIMFGPDI CGYSTKKVHAILTYNDTNHLIKKE  
VPCETDQLTHVYTFILRPDATYSILIDNVEKQSGSLYSDWDL LPPKTIKDPSAKKPEDWD  
EKEFIDDPEDKKPEGYDDIPEEITDPDAKKPEDWDDQEDGEWTAPTIPNPEYKGPWKPKK

IKNPNYKWKAPLIDNPDFKDDPDLYVFPNLKYVGVELWQVKSGLTFDNIVICDDPEYA  
KAIAEETWKGKQDAEKAAFEEAEK-KREEESKAAPADSDAE-EDDDADDDADDAD--DK  
LESKDDEAH-----DEL

> *A. thaliana* Crt1

-----MAKLNPKFISLILFAL-----VVIVSAEVIFEEK---FEDGWKRWVKS DWKK  
DDNT-AGEWKHTAGNWSGDAN-DKGIQTSEDYRFYAISAEFPEFSNKDKTLVLFQFSVKHE  
QKLDCCGGYMKLLSDDVDQTKFGGDTTPYSIMFGPDICGYSTKKVHAILTYNGTNHLIKKE  
VPCETDQLTHVYTFVLRPDATYSILIDNVEKQTGSLYSDWDLPLPAKKIKDPSAKKPEDWD  
DKEYIPDPEDTKPAGYDDIPKEIPDTDAKKPEDWDDEEDGEWTAPTIPNPEYNGEWKPKK  
IKNPAYKWKAPMIDNPEFKDDPELYVFPKLYVGVELWQVKSGLTFDNVLSDDPEYA  
KKLAEETWKGKQDAEKAAFDEAEK-KREEESKDAPAESDAEEEAEDDDNEGDDSDNESK  
SEETKEAEETKE---AEETDAAHDEL

> *B. stolonifera* Crt

-----MAIAERRSRSHLALR-----VRDRVSAEVFFFEER---FEDGWESKWVKS DWKR  
DENM-AGEWNFTSGKWNWDAN-DKGIQTSEDYRFYAISAAFPEFSNKDKTLVLFQFSVKHE  
QKLDCCGGYMKLLSGDQKFKGGDTTPYSIMFGPDICGYSTKKVHAILTKGETNHLIKKD  
VPCETDQLTHVYTFILRPDASYSILIDNVEKQSGSVYTDWDILPPKQIKDPEAKKPEDWE  
DKEYIPDPEDKKPEGYDDIPKEITDPEAKKPEDWDDEEDGEWTAPTIPNPYKGEWKPKK  
IKNPNFKGKWKAPMIDNPDFKDDPDIYVFPKLYVGIELWQVKSGLTFDNVLI CDDPDYA  
KKLAEETWKGKQDAEKAAFDEAEK-KKEEEEAKDDPTESDDEKPDEEGESDGEDESKD  
IDNEEDED-----VHDEL

> *H. vulgare* Crt2

-----LLRRLAL-----LALASVAAVAADVFFQEK---FEDGWESRWVKS EWKK  
DENM-AGEWNHTSGKWHGDAE-DKGIQTSEDYRFYAISAEYPEFSNKDKTLVLFQFTVKHE  
QKLDCCGGYVKKLLGGDQKFKGGDTTPYIMFGPDICGYSTKKVHTILTKNGKNHLIKKD  
VPCETDQLSHVYTLIIRPDATYSILIDNEEKQTGSIYEHWDILPPKEIKDPEAKKPEDWD  
DKEYIPDPEDVKPEGYDDIPKEVTDPAKKPEDWDDEEDGEWTAPTIPNPEYKGPWKQKK  
IKNPNYQGWKAPMIANPDFQDDPYIYAFDSLKYIGIELWQVKSGLTFDNILITDDAALA  
KTFAEETWAKHKDAEKAAFDEAEK-KKEEEDASKAGED-DDDLDEDEDADDED-KDDKAGS  
DAEDDK-----DSDDEK-HDEL

> *H. vulgare* Crt1

-----RIGKKALESR---LVCASVAAVAADVFFQEK---FEDGWESRWVKS EWKK  
DENM-AGEWNHTSGKWHGDAE-DKGIQTSEDYRFYAISAEYPEFSNKDKTLVLFQFTVKHE  
QKLDCCGGYVKKLLGGDQKFKGGDTTPYIMFGPDICGYSTKKVHTILTKNGKNHLIKKD  
VPCETDQLSHVYTLIIRPDATYSILIDNEEKQTGSIYEHWDILPPKEIKDPEAKKPEDWD  
DKEYIPDPEDVKPEGYDDIPKEVTDPAKKPEDWDDEEDGEWTAPTIPNPEYKGPWKQKK  
IKNPNYQGWKAPMIANPDFQDDPYIYAFDSLKYIGIELWQVKSGLTFDNILITDDAALA  
KTFAEETWAKHKDAEKAAFDEAEK-KKEEEDASKAGED-DDDLDEDEDADDED-KDDKAGS  
DAEDDK-----DSDDEK-HDEL

> *M. truncatula* Crt1

---MAIRVRNPNLLSLVLFSS-----LLSIASAKVFFFEER---FQDGWESRWVKS EWKK  
DENL-AGEWNYTSGQWNGDAN-DKGIQTSEDYRFYAISAEFPEFSNKDNTLVLFQFSVKHE  
QKLDCCGGYMKLLSGDQKFNFGGDTTPYSIMFGPDICGYSTKKVHAILTYNDTNHLIKKD  
VPCETDQLTHVYTFIIRPDATYSILIDNVEKQTGSLYSDWSLLPPKIKDPEAKKPEDWD  
DKEFIPDPEDKKPEGYDDIPKEVADPAKKPEDWDDEEDGEWTAPTIANPEYKGPWKPKK  
IKNPNYSGWKAPLIDNPDFKDDPDIYVFPKLYVGIELWQVKSGLTFDNVVI TDDPEYA  
KQVAEETWKGKQDAEKAAFEEAEK-KKEEETKDDPVSDAEDEEDANEVSHSDSDESK  
AEAGEDSDET-----NKDDVHDEL

> *O. sativa* Crt1/2

-----MAIRARSSSYAAAVALALALASVAAVAGEVFFQEK---FEDGWESRWVKS EWKK  
DENM-AGEWNHTSGKWNWDPE-DKGIQTSEDYRFYAISAEYPEFSNKDKTLVLFQFSVKHE  
QKLDCCGGYVKKLLGGDQKFKGGDTTPYSIMFGPDICGYSTKKVHTIFTKNDKNHLIKKD  
VPCETDQLSHVYTLIIHPDATYTILIDNVEKQSGSIYEHWDILPPKQIKDPEAKKPEDWD  
DKEYIPDPEDKKPEGYDDIPKEIPDPDAKKPEDWDDEEDGEWTAPTIPNPEYKGPWKQKK  
IKNPNYQGWKAPMIDNPDFKDDPYIYAFDSLKYIGIELWQVKSGLTFDNFLITDDPELA  
KTFAEETWKGKQDAEKAAFDEAEK-KKEEAAA KAGED-DDDLDEDEDAEDEDKADKADKADS  
DAEDGK-----DSDDEK-HDEL

> *O. sativa* Crt3

-MG--SRSGGR---HRLFLRFIALSSLLLIAAGEVIFEER---FEDGWESRWVKS DWKR  
SEGK-AGTFKHTAGRYSGDPD-DKGIQTTL DARHFAISAKIPEFSNKGRTLVLQYSIKFE  
QDIECGGGYIKLMSGYVNQKKFSGDTPYSIMFGPDI CGTQTKKLHLILSYQGQNYPIK KD  
LQCETDKLTHVYTFILRPDASYSILVDNRERESGSMYTDWDILPPRKIKDVHAKKPKDWD  
DREYIEDPDAVKPEGYDSIPKEIPDPKDKKPD TDWDDDDGIWKPRMIPNPAYKGPWKRKK  
IKNPNYK GKWKIPWIDNPEFEDDPDLYVLKPLKYIGIEVWQVKAGSVFDNILICDDPEYA  
RKA AEETWGANREAEKEAFEEAEK ERKAREDK EAERAREEGERRRRERGRDRHRGRD-YKD  
RYKRRHRDHWD DD-----YHDEL

> P. armeniaca Crt

---MAFRVPNSSLLSLILLS-----LLAIASAKVFFFEER---FEDGWDKRWVTSEWKK  
DENL-AGEWNYTSGKWN GDN-DKGIQTSEDYRFYAISAEFPEFSNKDKTLVLFQFSVKHE  
QKLD CGGGYIKLLSGD V DQKKFGDTPYSIMFGPDI CGYSTKKVHAILNYNNTNLIK KD  
VPCETDQLTHVYTFIIRPDATYSILIDNLEKQTGSLYSDWDL LPAKKIKDPEAKKPEDWE  
DQEYIPDPEDKKPEGYDDIPKEITDPDAKKPEDWDDEEDGEWTAPTIPNPEYKGEWKPKK  
IKNPNFKGKWKAPLIDNPEFKDDPELYVYPNLKYVGI ELWQVKS GTLFDNILITDEPEYA  
KQLAEETWGKQKDAEKA AFEELEK-KLQEEESKEDPVSDAE DDDNEAEDGE-ESDSESK  
PDSTEE SAET-----EAEKHDEL

> P. taeda Crt

-----MAGRRSLLYAVFLLL-----FVTLVSAEVFFFEER---FDDSWESRWVQSDWKK  
DESL-AGDWWHTSGKWN GDN-DKGIQTHTDYRFFAISAAYPEFSNKDKTLVLFQFSVKHE  
QKLD CGGGYV KLLSGEIDQKNFSGETPYSIMFGPDI CGYSTKKVHTILSYKG-KHPIK KD  
VPCETDQLTHVYTFILRPDATYSILIDNTDKQSGSLYKDWDL LPPKTIKDPNAKKPEDWD  
DKEYIPDPEDKKPEGYDDIPKEIPDPDATKPEDWNDEEDGEWTAPTIANPEYKGPWKPKK  
IKNPNYK GKWKAPMIDNPDFKDDPELYVFPNLKYLGI ELWQVKS GTLFDNILISDDPEYA  
KKLAEETWAKHKDAEKEAFDEAEK-KKEEEKEKESDDEEDTDEKEEKSDDEDAD ELDDE  
HKEADKKEHELDSEHKEEDKKEHDEL

> R. communis Crt

-----MANPKSLSLFLLS-----LLAIASAEVFFFEER---FEDGWENRWVKS DWKK  
DENT-AGEWNYTSGKWN GDN-DKGIQTSEDYRFYAISAEFPEFSNKDKTLVLFQFSVKHE  
QKLD CGGGYMKLLSSSTDQKKFGDTPYSIMFGPDI CGYSTKKVHAILNYNNTNHLIK KE  
VPCETDQLTHVYTLVIRPDATYSILIDNVEKQTGSLYTDWDL LPPKIKDPEAKKPEDWD  
EKEYIPDPEDKKPEGYDDIPKEIPDPDAKKPEDWDDEEDGEWTAPTIANPEYKGPWKPKK  
IKNPNYK GKWKAPMIDNPDFKDDPEIYVYPNLKYVGI ELWQVKS GTLFDNVLICNDPEYA  
KQLAEETWGKNKDAEKA AFEEAEK-KKEEEESKDDPADSDADEDDDDADDT EGEDDGE SK  
SDAAEDSAE-----DVHDEL

> V. vinifera Crt3

-MGFLSNSSGFSMDLKKLLLLPLLLSFLTLFSLSEVIFEER---FEDGWQSRWVKS DWKK  
SEGK-AGSFKHTAGKWAGDPD-DKGIQTSTDARHFAISAKIPEFSNKNRTLVLQYSIRFE  
QEIECGGGYIKLLSGFVNQKKFGDTPYSVMFGPDL CGTQTKKLHVIVSYQGQNYPIK KD  
LQCETDKLTHVYTFILRPDASYSVLIDNRERESGSMYSDWDILPPRKIKDTKAKKPADWD  
DREYIEDPNDVKPEGYDSIPAEIPDPKAKEPDNWD EEDGLWKPPKIPNPAFKGPWRRKK  
IKNPNYK GKWKNQWIDNPEFEDDPDLYVLKPIKYVGI EVWQVKAGAIYDNILICDDPEYA  
KQVVEEVFAH-RESEKEAFEEAEKVRKAREEEEAQRAREEGERRRRERGHDR--RYRDRE  
RYRDRYRRVCIS-----YA---

> Z. mays Crt1

-----MAIR-KGSSYAVAAL---LALASVA AVAGEVFFQEK---FEDGWESRWVKS EWKK  
DENM-AGEWNHTSGKWN GDAE-DKGIQTSEDYRFYAISAEYPEFSNKDKTLVLFQFSVKHE  
QKLD CGGGYV KLLGGD V DQKKFGDTSYSIMFGPDI CGYSTKKVHTILTKDGKNHLIK KD  
VPCETDQLTHVYTLIIRPDATYSILIDNEEKQTGSIYEHWDILPPKIKDPEAKKPEDWD  
DKEYIPDPEDKKPEGYDDIPKEIPDPDAKKPEDWDDEEDGEWTAPTIPNPEYKGPWKQKK  
IKNPNYQ GKWKAPMIDNPDFKDDPYIYAFDSLKYIGIE ELWQVKS GTLFDNIIITDDPALA  
KTFAEETWGKHKEAEKA AFDEAEK-KKEEEDA AKGGDDEDDLEDEEDDEKA-DEDKADS  
DAEDSK-----DSDDEKQHDEL

> Z. mays Crt2

-----MAIR-KGSSYAVAAL---LALASVA AVAGEVFFQEK---FEDGWESRWVKS EWKK  
DENM-AGEWNHTSGKWN GDAE-DKGIQTSEDYRFYAISAEYPEFSNKDKTLVLFQFSVKHE  
QKLD CGGGYV KLLGGD V DQKTLGGDTSYSIISRPDISRYSTKKVHTILTKDGKNHLIK KD  
VPCQTDQLTHVYTFIIRPDATYSILIDNEEKHTGSIYEHWDILPPKIKDPEAKKPEDWD

DKEYIPDPEDKKPEGYDDIPKEIPDPDAKKPEDWDDEEDGEWTAPTIPNPEYKGPWKQKK  
IKNPNYQGWKAPMIDNPDFKDDPYIYAFDSLKYIGIELWQVKSGLTFDNIITDDPALA  
KTFAEETWGHKEAEKAAFDEAEK-KKEEEDAAGGDEDDLEDEEDDEKA-DEKADS  
DAEDGK-----DSDDEK-HDEL

> *Z. mays* Crt3

-MGTGRRGGGG---GGVFHRLALSSLLLLASGEVVFEEER---FEDGWETRWVESDWKR  
SEGK-AGRFKHTAGRYSADPD-DKGIQTTIDARHFAISAKFPEFSNKNRTLTVVQYSIKFE  
QDIECGGGYIKLMSGYVNQKKFSGDTPYSLMFGPDICGTQTKKLHLILSYQGQNYPIKGD  
LECETDKLTHVYTFILRPDASYSLLVDNRERESGSMYTDWDILPPRKIKDVHAKRPKDWD  
DREYIEDPDEVKPEGYDSIPKQIPDPKDKKPDTWDEDEDGIWKPRMVSNPAYKGPWKRKR  
IKNPNYKGWKTPWIDNPEFEDDPDLYVLKPLKYIGIEVWQVKSGLTFDNIITDDPALA  
RKVVEETWGANREAEKEAFEEAEKERKAREGQKAKDDGGRHRIH-----  
RHKKHYRDHWDD-----YHDEL

> *M. fuscata* Crt

-----MLLSVPLLLGLLG-----LAAAEPAVYFKEQ-FLDGDGWTSRWIESKHKS  
DFGK---FVLSSGKFGYDDEEKDKGLQTSQDARFYALSASFEPFSNKGQTLVVQFTVKHE  
QNIDCGGGYVKLFPNSLDQTMHGDSEYNIMFGPDICGPGTKKVHVI FNYKGNVLINKD  
IRCKDDEFTHLYTLIVRPDNTYEVKIDNSQVESGSLEDDWDFLPPKKIKDPDASKPEDWD  
ERAKIDDPDTSKPEDWD-KPEHIPDPDAKKPEDWDEEMDGEWEPPVIQNPEYKGEWKPRQ  
IDNPDYKGTWIIHPEIDNPEYSPDPSIYAYDNFVGLGLDLWQVKSGLTFDNIITDDPALA  
EEFGNETWGVTKVSPGPDDEEQRL--KEEEDDKRKEEEEAEDKEDDEDKDEDEEEDK  
EEDEEEDVPG-----QAKDEL
